# Supplementary material
Source: HighWire-hosted journal article supplement (http://jmg.bmjjournals.com/highwire/filestream/160496/field_highwire_adjunct_files/1/Table_S1.pdf)
Supplement: Table_S1.pdf [file Table_S1.pdf]

**Table S1.** Data on *FGF10* heterozygous individuals and non-carrier siblings.

| Patient | Status | FGF10 mutation | Age (yrs) | Height (cm) | Weight (kg) | Sex | Asthma** | Asthma medicine                       | Allergy# | Smoking | Note                                         |
|---------|--------|----------------|-----------|-------------|-------------|-----|----------|---------------------------------------|----------|---------|----------------------------------------------|
| IA37    | 1      | del            | 69        | 180         | 98          | m   | 1        |                                       | 1        | 2       | Smoked for 45 years. Non-smoker for 5 years  |
| KS68    | 1      | del            | 37        | 173         | 58          | f   | 2        | Budesonid and Terbutalin              | 2        | 2       | Smoked for 8 years. Non-smoker for 11 years  |
| MS88    | 1      | del            | 17        | 173         | 64          | f   | 2        | Budesonid and Terbutalin              | 2        | 1       | Non-smoker                                   |
| MS90    | 1      | del            | 15        | 165         | 61          | f   | 1        |                                       | 1        | 1       | Non-smoker                                   |
| MS92    | 1      | del            | 13        | 159         | 48          | f   | 2        | Budesonid, Formoterol and Terbutalin  | 1        | 1       | Non-smoker                                   |
| PA74    | 1      | del            | 32        | 183         | 71          | m   | 1        |                                       | 1        | 2       | Smoked for 6 years. Non-smoker for 3 years   |
| GA80    | 1      | del            | 26        | 180         | 82          | m   | 2        | Budesonid and Terbutalin              | 2        | 1       | Non-smoker                                   |
| JA48    | 1      | del            | 58        | 178         | 96          | m   | 1        | Tiotropiumbromid                      | 1        | 3       | Smokes 14 cigarettes per day                 |
| LA41    | 1      | del            | 65        | 182         | 78          | m   | 1        |                                       | 1        | 1       | Non-smoker                                   |
| BA45    | 1      | del            | 62        | 185         | 108         | m   | 1        |                                       | 1        | 3       | Smokes 6 cigarettes per day                  |
| CS88    | 1      | p.R193X        | 18        | 162         | 61          | f   | 2        | Flutikason, Salmeterol and Salbutamol | 2        | 1       | Non-smoker                                   |
| CS54    | 1      | p.R193X        | 53        | 170         | 61          | f   | 2        |                                       | 1        | 1       | Non-smoker                                   |
| MF77    | 2      | _              | 30        | 170         | 73          | f   | 1        |                                       | 1        | 3       | Smokes                                       |
| JA74    | 2      | _              | 33        | 185         | 70          | m   | 1        |                                       | 1        | 2       | Smoked for 10 years. Non-smoker for 12 years |
| ES74    | 2      | _              | 34        | 163         | 73          | f   | 2        |                                       | 2        | 1       | Non-smoker                                   |

\* Status: 1 = Patient, 2 = Control; † Asthma/allergy: 1 = No, 2 = Yes; ‡ Smoking: 1 = No [non-smokers], 2= Quit [former smokers], 3 = Yes [current smokers]. Del = deletion comprising exons 2 and 3 of the *FGF10* gene. \*\* Asthma was diagnosed in some patients from anamnestic information only and prior to this study. # Allergy was tested using the RAST test and confirmed allergy to cat, horse, dog and grass.
